# Supplementary material
Source: publisher figshare collection journal article supplement (https://acs.figshare.com/ndownloader/files/13151531)
Supplement: Supplementary file 1 [file 13151531]

Supporting information

**Ultra-small and Monolayered Tungsten Dichalcogenides  
Quantum Dots with Giant Spin-Valley Coupling and Purple  
Luminescence**

**Kaiyu Zhang,<sup>†</sup> Lin Fu,<sup>†</sup> Weili Zhang,<sup>†</sup> Hongzhe Pan,<sup>†</sup> Yuanyuan Sun,<sup>‡</sup>  
Chuannan Ge,<sup>†,§</sup> Youwei Du,<sup>†</sup> and Nujiang Tang<sup>†,\*</sup>**

<sup>†</sup>National Laboratory of Solid State Microstructures, Jiangsu Provincial Key  
Laboratory for Nanotechnology, Nanjing University, Nanjing 210093, China

<sup>‡</sup>School of Physics & Electronic Engineering, Linyi University, Linyi 276005, China

<sup>§</sup>School of Physics & Electronic Engineering, Jiangsu Second Normal University,  
Nanjing 210013, China

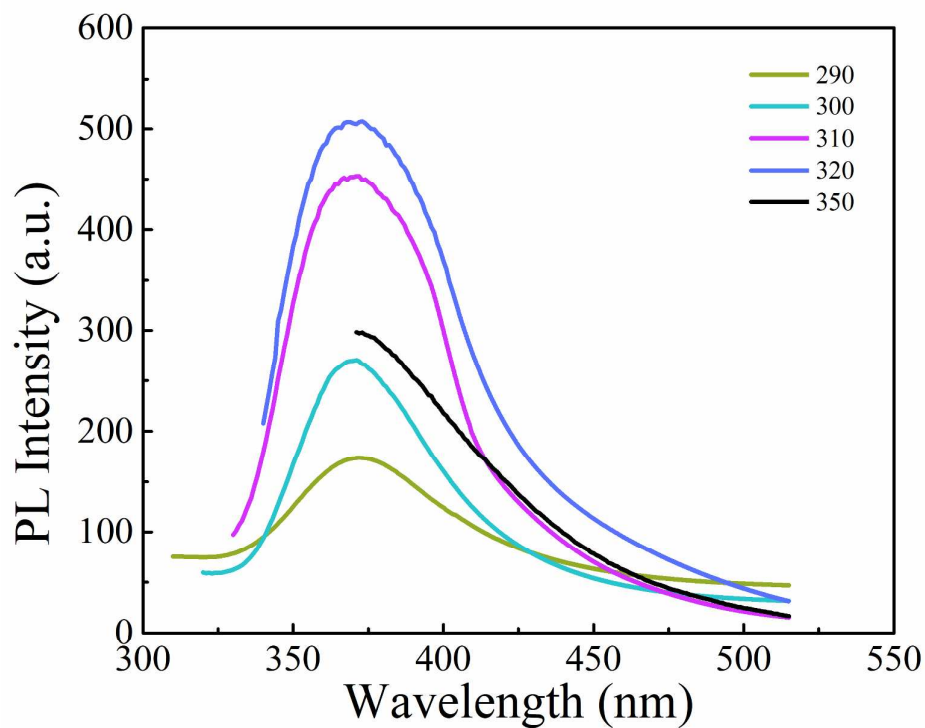

**Figure S1.** PL spectra of sonicated NMP. It is found that the sonicated NMP shows one peak at about 370 nm, similar to the result reported.<sup>1</sup> It is clear that this PL emission position is much different from the PL emission peak of our ultra-small monolayered quantum dots (emission peak A: 420 nm and B: 342 nm).

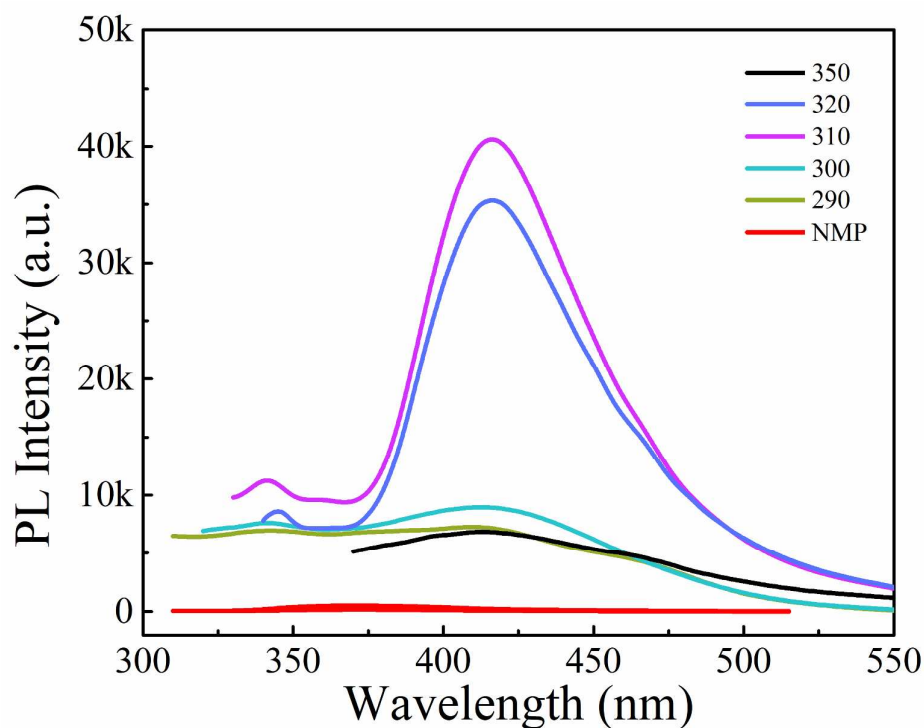

**Figure S2.** PL spectra of annealed WS<sub>2</sub> QDs and sonicated NMP. According to the result reported,<sup>1</sup> the as-received NMP exhibits only very weak photoluminescence. Based on the PL intensity, Figure S2 shows the PL spectra of sonicated NMP and ultra-small monolayered WS<sub>2</sub> QDs. As shown, the intensity of ultra-small monolayered WS<sub>2</sub> QDs is much stronger than that of the sonicated NMP solvent. The five PL spectral lines of NMP are almost overlapped. Reasonable, the contribution of NMP solvent is negligible, and the purple luminescence should originate from our ultra-small monolayered WS<sub>2</sub> QDs.

## Supporting REFERENCES

(1) Ogilvie, S. P.; Large, M. J.; Fratta, G.; Meloni, M.; Canton-Vitoria, R.; Tagmatarchis, N.; Massuyeau, F.; Ewels, C. P.; King, A. A. K.; Dalton, A. B. Considerations for Spectroscopy of Liquid-exfoliated 2D Materials: Emerging Photoluminescence of N-methyl-2-pyrrolidone. *Sci. Rep.* **2017**, 7, 16706.
